# Supplementary material
Source: publisher figshare collection journal article supplement (https://frontiersin.figshare.com/ndownloader/files/22807250)
Supplement: Supplementary file [file 22807250]

**Appendix Table 1: Secondary outcomes in the intention-to-treat population**

**Appendix Table 2: Laboratory data of 42 patients with server COVID-19 at baseline**

**Appendix Table 3: The frequency of complications for the GC plus group vs the standard of care alone group using descriptive statistics for the intention-to-treat populations**

**Appendix Table 4: The frequency of treatments for the GC plus group vs the standard of care alone group using descriptive statistics for the intention-to-treat populations**

**Appendix Table 5: Laboratory data of 40 patients with server COVID-19 at day 7**

**Appendix Table 1: Secondary outcomes in the intention-to-treat population**

| Secondary outcomes                                                  | Standard of Care plus GC<br>(n=28) | Standard of Care<br>(n=14) | Difference (95%CI)*      | P Value |
|---------------------------------------------------------------------|------------------------------------|----------------------------|--------------------------|---------|
| Survival at 7 days, n (%)#                                          | 27 (96)                            | 13 (93)                    | 3.57 (-11.57 to 18.71)   | 0.6084  |
| Score of 3 to 5 on COVID-19 clinical status scale at 7 days, n (%)† | 3 (11)                             | 3 (21)                     | -10.71 (-35.07 to 13.64) | 0.3496  |
| Procalcitonin, ng/mL**                                              | 0.02 (0.02-0.05)                   | 0.012 (0.02-0.03)          | 0 (0 to 0.03)            | 0.3229  |
| Antibiotic use, n (%)                                               | 23 (82)                            | 10 (71)                    | 10.71 (-16.88 to 38.30)  | 0.4250  |

GC=guideline based Chinese herbal medicine treatment. Data are expressed median (IQR) unless otherwise indicated.

#Overall survival at 7 days defined as the period from the first day of assigned treatment to 7 days.

†COVID-19 clinical status scale ranges from 0 (discharge) to 5 (death), with higher scores indicating worse prognosis.

\*Calculated using a generalized linear model.

\*\*Hodges–Lehmann estimate of location shift (pseudo-median). p was calculated from Kruskal–Wallis test.

**Appendix Table 2: Laboratory data of 42 patients with severe COVID-19 at baseline**

|                                          | Standard of Care plus GC<br>(n=28) | Standard of Care<br>(n=14) |
|------------------------------------------|------------------------------------|----------------------------|
| <b>Blood routine</b>                     |                                    |                            |
| Haemoglobin, g/L                         | 130 (124-146)                      | 127 (119-135)              |
| WBC count, $\times 10^9/L$               | 5.58 (4.73-7.11)                   | 5.49 (4.48-5.97)           |
| Lymphocyte count, $\times 10^9/L$        | 1.04 (0.72-1.29)                   | 1.21 (0.8-1.37)            |
| Neutrophil count, $\times 10^9/L$        | 4.32 (2.8-5.55)                    | 3.6 (2.48-4.73)            |
| Haematocrit, %                           | 38.9 (37.5-43.2)                   | 39.3 (36.9-40.7)           |
| Platelets, $\times 10^9/L$               | 206 (164-262)                      | 186 (181-256)              |
| <b>Coagulation function</b>              |                                    |                            |
| Activated partial thromboplastin time, s | 30.6 (28.7-34)                     | 30.4 (29-36.6)             |
| Prothrombin time, s                      | 13.4 (12.6-14.1)                   | 12.7 (11.7-13.8)           |
| INR                                      | 1.13 (1.05-1.18)                   | 1.06 (0.97-1.15)           |
| <b>Blood biochemistry</b>                |                                    |                            |
| Alanine aminotransferase, U/L            | 25 (14-44)                         | 19 (13.5-34.5)             |
| Total Bilirubin, mmol/L                  | 10.7 (8.7-14.1)                    | 10.7 (8-12.05)             |
| Aspartate aminotransferase, U/L          | 32 (25-52)                         | 23 (19-29.5)               |
| Glucose, mmol/L                          | 7.25 (5.67-9.49)                   | 5.57 (5.43-5.90)           |
| Blood Urea Nitrogen (urea), mmol/L       | 5.37 (4.46-6.69)                   | 4.14 (3.36-5.08)           |
| Serum Creatinine, $\mu\text{mol/L}$      | 77.10 (60-87.7)                    | 62.35 (57.7-70.55)         |
| Lactate dehydrogenase, U/L               | 277 (220-393)                      | 219 (189-303)              |
| Creatine kinase, U/L                     | 76 (60-87.7)                       | 74 (32-91)                 |
| Sodium, mmol/L                           | 138.8 (137.6-140.3)                | 139.5 (137.2-142.45)       |
| Potassium, mmol/L                        | 3.62 (3.18-3.85)                   | 3.77 (3.46-3.97)           |
| <b>Infection-related biomarkers</b>      |                                    |                            |
| Procalcitonin, ng/mL                     | 0.056 (0.022-0.083)                | 0.033 (0.02-0.05)          |
| C-reactive protein, mg/L                 | 26.8 (7.63-39.6)                   | 23.33 (3.18-50.77)         |
| HSCRP                                    | 47.85 (8.16-89.57)                 | 14.05 (6.78-29.65)         |
| Erythrocyte sedimentation rate, mm/h     | 45 (14-85)                         | 49 (21-103.6)              |

INR, International Normalized Ratio; IQR, interquartile range; HSCRP, high-sensitivity C-reactive protein; Data are presented as median (IQR) unless otherwise indicated.

**Appendix Table 3: The frequency of complications for the GC plus group vs the standard of care alone group using descriptive statistics for the intention-to-treat populations**

| Complications no. (%)                                                  | Standard of Care plus GC<br>(n=28) | Standard of Care<br>(n=14) | Difference (95%CI)*     | P Value |
|------------------------------------------------------------------------|------------------------------------|----------------------------|-------------------------|---------|
| Bacterial pneumonia                                                    | 17 (60.71)                         | 7 (50.00)                  | 10.71 (-21.12 to 42.55) | 0.508   |
| Cardiac arrhythmia                                                     | 10 (35.71)                         | 6 (42.86)                  | -7.14 (-30.56 to 24.27) | 0.653   |
| Liver dysfunction                                                      | 7 (25.00)                          | 2 (14.29)                  | 10.71 (-13.64 to 35.07) | 0.692   |
| Bacteremia                                                             | 5 (17.86)                          | 1 (7.14)                   | 10.71 (-8.86 to 30.29)  | 0.645   |
| Bronchiolitis                                                          | 5 (17.86)                          | 1 (7.14)                   | 10.71 (-8.86 to 30.29)  | 0.645   |
| Coagulation disorder /<br>Disseminated<br>Intravascular<br>Coagulation | 1 (3.57)                           | 2 (14.29)                  | -10.71 (-30.29 to 8.86) | 0.254   |
| Hyperglycemia                                                          | 2 (7.14)                           | 0                          | 7.14 (-2.40 to 16.68)   | 0.545   |
| Myocardial ischemia                                                    | 0                                  | 1 (7.14)                   | -7.14 (-20.63 to 6.35)  | 0.333   |

\* Calculated using a generalized linear model.

**Appendix Table 4: The frequency of treatments for the GC plus group vs the standard of care alone group in the intention-to-treat populations**

| Treatment no. (%)        | Standard of Care plus GC<br>(n=28) | Standard of Care<br>(n=14) | Difference (95%CI)*     | P value |
|--------------------------|------------------------------------|----------------------------|-------------------------|---------|
| Antiviral agents         | 27 (96.43)                         | 12 (85.71)                 | 10.71 (-8.86 to 30.29)  | 0.2037  |
| Oxygen therapy           | 26 (92.86)                         | 12 (85.71)                 | 7.14 (-13.52 to 27.81)  | 0.4572  |
| Antibiotics              | 23 (82.14)                         | 10 (71.43)                 | 10.71 (-16.88 to 38.30) | 0.4250  |
| Corticosteroids          | 10 (35.71)                         | 3 (21.43)                  | 14.29 (-13.59 to 42.16) | 0.3451  |
| Non-invasive ventilation | 2 (7.14)                           | 1 (7.14)                   | 0 (-16.52 to 16.52)     | >0.999  |

\* Calculated using a generalized linear model.

**Appendix Table 5: Laboratory data of 40 patients with severe COVID-19 at day 7\***

|                                          | Standard of Care plus GC<br>(n=28) | Standard of Care<br>(n=14) | Difference (95%CI)**   | P value |
|------------------------------------------|------------------------------------|----------------------------|------------------------|---------|
| <b>Blood routine</b>                     |                                    |                            |                        |         |
| Haemoglobin, g/L                         | 124 (109-134)                      | 123 (111-134)              | 0 (-13 to 12)          | 0.9353  |
| WBC count, $\times 10^9/L$               | 7.66 (5.79-8.56)                   | 5.44 (3.94-8.30)           | 1.79 (-0.27 to 4.08)   | 0.1047  |
| Lymphocyte count, $\times 10^9/L$        | 1.31 (0.88-1.60)                   | 1.27 (1.14-1.77)           | -0.07 (-0.53 to 0.27)  | 0.6969  |
| Neutrophil count, $\times 10^9/L$        | 5.33 (4.32-6.91)                   | 4.20 (2.45-6.31)           | 1.38 (-0.56 to 3.33)   | 0.1679  |
| Haematocrit, %                           | 37.8 (33.3-41.3)                   | 37.55 (33.80-41.60)        | 0.10 (-4.10 to 3.90)   | 0.9741  |
| Platelets, $\times 10^9/L$               | 281 (221-343)                      | 288 (213.5-339.5)          | 8.50 (-68 to 92)       | 0.8711  |
| <b>Coagulation function</b>              |                                    |                            |                        |         |
| Activated partial thromboplastin time, s | 30.3 (29.3-31.4)                   | 32.10 (29.45-34.55)        | -1.55 (-4.50 to 1.20)  | 0.2812  |
| Prothrombin time, s                      | 12.4 (11.6-13.0)                   | 12.45 (12-13.6)            | -0.25 (-1.20 to 0.70)  | 0.5776  |
| INR                                      | 1.04 (0.96-1.09)                   | 1.04 (1.0-1.14)            | -0.02 (-0.10 to 0.06)  | 0.5894  |
| <b>Blood biochemistry</b>                |                                    |                            |                        |         |
| Alanine aminotransferase, U/L            | 28 (16-49)                         | 21 (12-36.5)               | 7 (-6.0 to 22.0)       | 0.2204  |
| Total Bilirubin, mmol/L                  | 13.35 (8.45-16.9)                  | 15.15 (8.9-18.55)          | -0.5 (-5.6 to 3.9)     | 0.7498  |
| Aspartate aminotransferase, U/L          | 22 (17-29.5)                       | 22 (17-32)                 | 0 (-7.0 to 6.0)        | 0.9732  |
| Glucose, mmol/L*                         | 43.83 (43.83-43.83)                | 5.57 (5.43-5.90)           |                        |         |
| Blood Urea Nitrogen (urea), mmol/L       | 5.16 (3.82-6.35)                   | 4.14 (3.36-5.08)           | 1.09 (-0.28 to 2.49)   | 0.1309  |
| Serum Creatinine, $\mu\text{mol/L}$      | 69.20 (57.95-76.7)                 | 62.35 (57.7-70.55)         | 6.25 (-3.1 to 18.3)    | 0.1604  |
| Lactate dehydrogenase, U/L               | 218.5 (188-600)                    | 219 (189-303)              | 23.5 (-13 to 985)      | >0.999  |
| Creatine kinase, U/L                     | 38.5 (36-44)                       | 74 (32-91)                 | -4.0 (-17.0 to 862)    | 0.3559  |
| Sodium, mmol/L                           | 139.9 (138.5-140.8)                | 139.5 (137.2-142.45)       | 0 (-1.6 to 1.5)        | 0.9482  |
| Potassium, mmol/L                        | 4.05 (3.9-4.3)                     | 3.77 (3.46-3.97)           | 0.17 (-0.11 to 0.45)   | 0.2175  |
| <b>Infection-related biomarkers</b>      |                                    |                            |                        |         |
| Procalcitonin, ng/mL                     | 0.02 (0.02-0.05)                   | 0.012 (0.02-0.03)          | 0 (0 to 0.03)          | 0.3229  |
| C-reactive protein, mg/L                 | 3.76 (2.68-12.39)                  | 6.35 (3.02-19.83)          | -1.63 (-6.62 to 1.30)  | 0.3295  |
| HSCRP                                    | 3.11 (3.11-9.83)                   | 3.30 (3.30-3.30)           | -0.19 (-0.19 to 146.7) | 0.7557  |
| Erythrocyte sedimentation rate           | 28.55 (18.25-56.05)                | 41.8 (41-51.50)            | -12.45 (-29.3 to 13.2) | 0.3081  |

INR, International Normalized Ratio; IQR, interquartile range; HSCRP, high-sensitivity C-reactive protein; Data are presented as median (IQR) unless otherwise indicated. Two patients died during 7-day treatment (Standard of Care plus GC, n=1; Standard of Care only, n=1).

\*\*Hodges-Lehmann estimate of location shift (pseudo-median). p was calculated from Kruskal-Wallis test.

\*one case in Standard of Care plus GC group;
